# Supplementary material for: Computational study of 4,4′-dimethoxy triphenylamine donor linked with low band gap π-spacers by single and double bonds for DSSC applications
Source: Royal Society of Chemistry journal article supplement (doi:10.1039/d1nj02714j), 2021-01-01
Supplement: d1nj02714j1.pdf [file d1nj02714j1.pdf]

## Computational study of 4, 4'- dimethoxy triphenylamine donor linked with low band gap $\pi$ spacers by single and double bond for DSSC applications

Divya Unny<sup>1#</sup>, Ganapathi Rao Kandregula<sup>1#</sup>, Kothandaraman Ramanujam<sup>1, 2, 3 \*</sup>

<sup>1</sup>*Department of Chemistry, Indian Institute of Technology Madras, Chennai, India, 600 036*

<sup>2</sup>*DST-IITM Solar Energy Harnessing Centre, Indian Institute of Technology Madras, Chennai, India, 600 036*

<sup>3</sup>*Potential Centre of Excellence: Advanced Centre for Energy Storage and Conversion, Indian Institute of Technology Madras, Chennai, India, 600 036*

*\*Corresponding author's e-mail: [rkraman@iitm.ac.in](mailto:rkraman@iitm.ac.in)*

*#Equally Contributed*

### Content:

1. **Fig. S1** The dihedral angle obtained from ground state optimized structures of the dyes (TC1-TC5) obtained using B3LYP/6-311+G (d,p) method in DCM solvent
2. **Fig. S2** The dihedral angle obtained from ground state optimized structures of the dyes (TC1''-TC5'') obtained using B3LYP/6-311+G (d,p) method in DCM solvent
3. **Fig. S3** Charge density difference calculation of dyes onto TiO<sub>2</sub> surface.
4. **Table S1** Ground state optimization followed by frequency calculations via different functional
5. **Table S2** The simulated absorption spectra parameters by TD-DFT calculations by different functionals and basis set

| Dyes  | Dihedral angle                                                                                            |                                                                                                            |                                                                                                             |
|-------|-----------------------------------------------------------------------------------------------------------|------------------------------------------------------------------------------------------------------------|-------------------------------------------------------------------------------------------------------------|
|       | W.r.t Donor – $\pi$ -Spacer                                                                               | W.r.t $\pi$ -Spacer - Acceptor                                                                             |                                                                                                             |
| TC1'' | 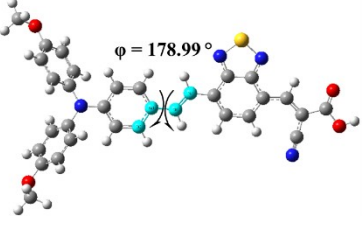 $\phi = 178.99^\circ$   |  $\phi = 179.7^\circ$    |  $\phi = 178.43^\circ$   |
| TC2'' |  $\phi = 178.59^\circ$   |  $\phi = 179.03^\circ$   |  $\phi = 179.50^\circ$   |
| TC3'' |  $\phi = 178.59^\circ$  |  $\phi = 179.1^\circ$   |  $\phi = 179.61^\circ$  |
| TC4'' |  $\phi = 178.59^\circ$ |  $\phi = 179.29^\circ$ |  $\phi = 179.48^\circ$ |
| TC5'' |  $\phi = 178.69^\circ$ |  $\phi = 179.27^\circ$ |  $\phi = 179.7^\circ$  |

**Fig. S1** The dihedral angle obtained from ground state optimized structures of the dyes (TC1''-TC5'') obtained using B3LYP/6-311+G (d,p) method in dichloromethane solvent

| Dyes | Dihedral angle                                                                                                              |                                                                                                                              |
|------|-----------------------------------------------------------------------------------------------------------------------------|------------------------------------------------------------------------------------------------------------------------------|
|      | W.r.t Donor – $\pi$ -Spacer                                                                                                 | W.r.t $\pi$ -Spacer - Acceptor                                                                                               |
| TC1  | 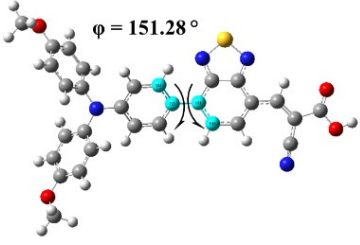 <p><math>\phi = 151.28^\circ</math></p>   |  <p><math>\phi = 179.69^\circ</math></p>   |
| TC2  |  <p><math>\phi = 141.91^\circ</math></p>   |  <p><math>\phi = 178.18^\circ</math></p>   |
| TC3  |  <p><math>\phi = 154.57^\circ</math></p>  |  <p><math>\phi = 179.50^\circ</math></p>  |
| TC4  |  <p><math>\phi = 148.23^\circ</math></p> |  <p><math>\phi = 179.47^\circ</math></p> |
| TC5  |  <p><math>\phi = 152.49^\circ</math></p> |  <p><math>\phi = 179.76^\circ</math></p> |

**Fig. S2** The dihedral angle obtained from ground state optimized structures of the dyes (TC1''-TC5'') obtained using B3LYP/6-311+G (d,p) method in dichloromethane solvent

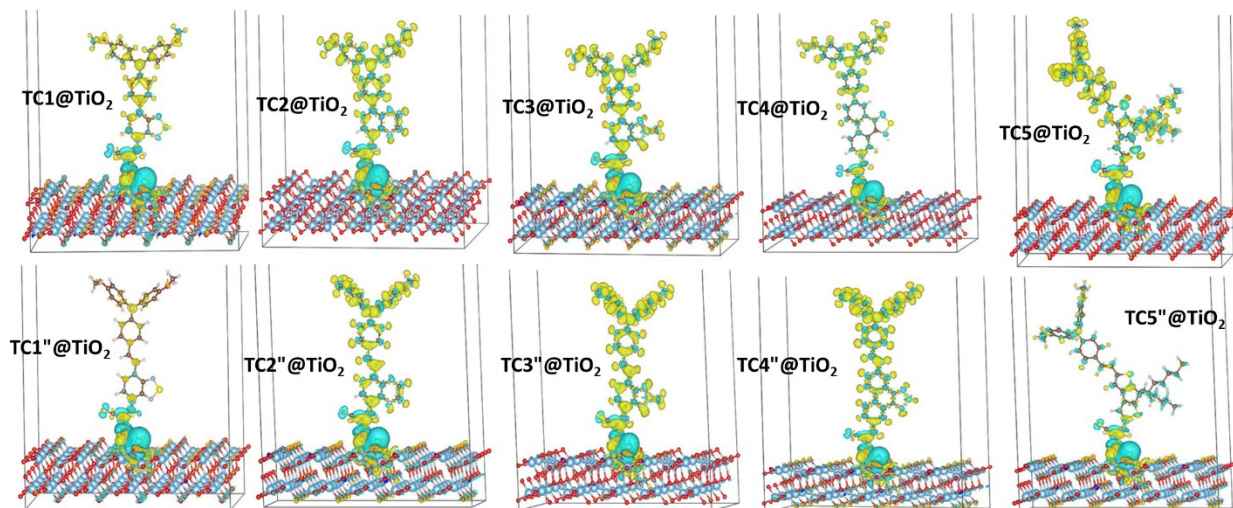

**Fig S3.** 3D charge density difference plot of the TC1-TC5 and TC1''-TC5'' on TiO<sub>2</sub> surface.

**Table S1** Ground state optimization followed by frequency calculations via different functional

| Functional          | Basis set    | HOMO /eV     | LUMO /eV     | HOMO-LUMO Energy gap /eV |
|---------------------|--------------|--------------|--------------|--------------------------|
| <b>Experimental</b> | NA           | <b>-5.08</b> | <b>-3.19</b> | <b>1.89</b>              |
| <b>B3LYP</b>        | 6-31G(d,p)   | -4.76        | -2.63        | 2.13                     |
| <b>B3LYP</b>        | 6-31+G(d,p)  | -5.01        | -2.93        | 2.08                     |
| <b>B3LYP</b>        | 6-311G(d,p)  | -5           | -2.81        | 2.19                     |
| <b>B3LYP</b>        | 6-311+G(d,p) | -5.07        | -2.95        | 2.12                     |
| <b>CAM-B3LYP</b>    | 6-31G(d,p)   | -6.02        | -1.44        | 4.58                     |
| <b>CAM-B3LYP</b>    | 6-31+G(d,p)  | -6.26        | -1.77        | 4.49                     |
| <b>CAM-B3LYP</b>    | 6-311G(d,p)  | -6.26        | -1.63        | 4.63                     |
| <b>CAM-B3LYP</b>    | 6-311+G(d,p) | -6.32        | -1.79        | 4.53                     |
| <b>M06</b>          | 6-31G(d,p)   | -5.09        | -2.49        | 2.6                      |
| <b>M06</b>          | 6-31+G(d,p)  | -5.3         | -2.76        | 2.54                     |
| <b>M06</b>          | 6-311G(d,p)  | -5.32        | -2.65        | 2.67                     |
| <b>M06</b>          | 6-311+G(d,p) | -5.37        | -2.76        | 2.61                     |
| <b>M06-2X</b>       | 6-31G(d,p)   | -5.96        | -1.78        | 4.18                     |
| <b>M06-2X</b>       | 6-31+G(d,p)  | -6.16        | -2.05        | 4.11                     |
| <b>M06-2X</b>       | 6-311G(d,p)  | -6.17        | -1.95        | 4.22                     |

|                |              |       |       |      |
|----------------|--------------|-------|-------|------|
| <b>M06-2X</b>  | 6-311+G(d,p) | -6.22 | -2.07 | 4.15 |
| <b>PBE1PBE</b> | 6-31G(d,p)   | -5    | -2.54 | 2.46 |
| <b>PBE1PBE</b> | 6-31+G(d,p)  | -5.19 | -2.79 | 2.4  |
| <b>PBE1PBE</b> | 6-311G(d,p)  | -5.18 | -2.68 | 2.5  |
| <b>PBE1PBE</b> | 6-311+G(d,p) | -5.23 | -2.8  | 2.43 |
| <b>TPSSH</b>   | 6-31G(d,p)   | -4.44 | -2.89 | 1.55 |
| <b>TPSSH</b>   | 6-31+G(d,p)  | -4.64 | -3.14 | 1.5  |
| <b>TPSSH</b>   | 6-311G(d,p)  | -4.63 | -3.03 | 1.6  |
| <b>TPSSH</b>   | 6-311+G(d,p) | -4.68 | -3.15 | 1.53 |
| <b>WB97XD</b>  | 6-31G(d,p)   | -6.6  | -0.92 | 5.68 |
| <b>WB97XD</b>  | 6-31+G(d,p)  | -6.8  | -1.19 | 5.61 |
| <b>WB97XD</b>  | 6-31G(d,p)   | -6.8  | -1.07 | 5.73 |
| <b>WB97XD</b>  | 6-31+G(d,p)  | -6.85 | -1.19 | 5.66 |

**Table S2** The simulated absorption spectra parameters by TDDFT calculations by different functionals and basis set

| <b>Functional (TC5)</b> | <b>Basis sets {Wavelength (nm) / oscillator strength}</b> |                           |                           |                           |
|-------------------------|-----------------------------------------------------------|---------------------------|---------------------------|---------------------------|
|                         | <b>6-31G(d,p)</b>                                         | <b>6-31+G(d,p)</b>        | <b>6-311G(d,p)</b>        | <b>6-311+G(d,p)</b>       |
| B3LYP                   | 671/0.0355,<br>459/0.2209                                 | 696/0.0443,<br>471/0.2365 | 669/0.0439,<br>461/0.2428 | 691/0.0491,<br>472/0.2458 |
| CAM-B3LYP               | 398/0.4447                                                | 412/0.4646                | 403/0.482                 | 413/0.4866                |
| M06                     | 573/0.049,<br>428/0.3263                                  | 589/0.0614,<br>439/0.3417 | 568/0.066,<br>430/0.3541  | 582/0.0728,<br>439/0.3573 |
| M06-2X                  | 406/0.3373                                                | 418/0.3657                | 410/0.3858                | 420/0.3929                |
| PBE1PBE                 | 599/0.0436,<br>431/0.2978                                 | 618/0.053,<br>441/0.313   | 598/0.0542,<br>433/0.3212 | 614/0.0595,<br>441/0.3225 |
| TPSSH                   | 844/0.0264,<br>507/0.1321                                 | 874/0.0324,<br>519/0.1444 | 837/0.0319,<br>507/0.1484 | 864/0.0354,<br>519/0.1517 |
| WB97XD                  | 382/0.6524                                                | 392/0.6708                | 387/0.6756                | 394/0.6828                |
| <b>Experimental</b>     | <b>553</b>                                                |                           |                           |                           |
